# Supplementary material for: Undescended Testes Growth Potential in Relation to Testis Position from Diagnosis until Puberty
Source: MDPI journal article supplement (doi:10.3390/jcm13092620), 2024-04-29
Supplement: s1 [file s1]

**Table S1.** Spearman rank correlation. The marked correlation coefficients are significant with  $p < 0.05000$ 

| Parameter      | The entire study group     |                |                |            |            |         |         |         |
|----------------|----------------------------|----------------|----------------|------------|------------|---------|---------|---------|
|                | Age                        | TV healthy (B) | TV healthy (E) | TV UDT (B) | TV UDT (E) | TAI (B) | TAI (E) | TGP UDT |
| Age            |                            | 0,951          | 0,916          | 0,893      | 0,867      | -0,453  | -0,261  | -0,229  |
| TV healthy (B) | 0,951                      |                | 0,937          | 0,925      | 0,879      | -0,436  | -0,251  | -0,275  |
| TV healthy (E) | 0,916                      | 0,937          |                | 0,854      | 0,932      | -0,404  | -0,230  | -0,053  |
| TV UDT (B)     | 0,893                      | 0,925          | 0,854          |            | 0,897      | -0,683  | -0,406  | -0,359  |
| TV UDT (E)     | 0,867                      | 0,879          | 0,932          | 0,897      |            | -0,565  | -0,482  | -0,016  |
| TAI (B)        | -0,453                     | -0,436         | -0,404         | -0,683     | -0,565     |         | 0,593   | 0,289   |
| TAI (E)        | -0,261                     | -0,251         | -0,230         | -0,406     | -0,482     | 0,593   |         | -0,080  |
| TGP UDT        | -0,229                     | -0,275         | -0,053         | -0,359     | -0,016     | 0,289   | -0,080  |         |
| Parameter      | Unilateral canalicular UDT |                |                |            |            |         |         |         |
|                | Age                        | TV healthy (B) | TV healthy (E) | TV UDT (B) | TV UDT (E) | TAI (B) | TAI (E) | TGP UDT |
| Age            |                            | 0,954          | 0,914          | 0,937      | 0,892      | -0,582  | -0,351  | -0,080  |
| TV healthy (B) | 0,954                      |                | 0,953          | 0,966      | 0,917      | -0,561  | -0,333  | -0,100  |
| TV healthy (E) | 0,914                      | 0,953          |                | 0,929      | 0,970      | -0,567  | -0,335  | 0,092   |
| TV UDT (B)     | 0,937                      | 0,966          | 0,929          |            | 0,940      | -0,693  | -0,409  | -0,131  |
| TV UDT (E)     | 0,892                      | 0,917          | 0,970          | 0,940      |            | -0,635  | -0,477  | 0,123   |
| TAI (B)        | -0,582                     | -0,561         | -0,567         | -0,693     | -0,635     |         | 0,536   | 0,137   |
| TAI (E)        | -0,351                     | -0,333         | -0,335         | -0,409     | -0,477     | 0,536   |         | -0,218  |
| TGP UDT        | -0,080                     | -0,100         | 0,092          | -0,131     | 0,123      | 0,137   | -0,218  |         |
| Parameter      | Bilateral canalicular UDT  |                |                |            |            |         |         |         |
|                | Age                        | TV healthy (B) | TV healthy (E) | TV UDT (B) | TV UDT (E) | TAI (B) | TAI (E) | TGP UDT |
| Age            |                            | 0,972          | 0,976          | 0,801      | 0,817      | -0,279  | -0,061  | 0,250   |
| TV healthy (B) | 0,972                      |                | 0,996          | 0,802      | 0,807      | -0,237  | -0,024  | 0,185   |
| TV healthy (E) | 0,976                      | 0,996          |                | 0,805      | 0,812      | -0,262  | -0,023  | 0,229   |
| TV UDT (B)     | 0,801                      | 0,802          | 0,805          |            | 0,940      | -0,715  | -0,407  | 0,154   |
| TV UDT (E)     | 0,817                      | 0,807          | 0,812          | 0,940      |            | -0,604  | -0,527  | 0,394   |
| TAI (B)        | -0,279                     | -0,237         | -0,262         | -0,715     | -0,604     |         | 0,604   | -0,085  |
| TAI (E)        | -0,061                     | -0,024         | -0,023         | -0,407     | -0,527     | 0,604   |         | -0,399  |
| TGP UDT        | 0,250                      | 0,185          | 0,229          | 0,154      | 0,394      | -0,085  | -0,399  |         |
| Parameter      | Intra-abdominal UDT        |                |                |            |            |         |         |         |
|                | Age                        | TV healthy (B) | TV healthy (E) | TV UDT (B) | TV UDT (E) | TAI (B) | TAI (E) | TGP UDT |
| Age            |                            | 0,919          | 0,917          | 0,805      | 0,880      | 0,071   | -0,152  | -0,281  |
| TV healthy (B) | 0,919                      |                | 0,922          | 0,761      | 0,827      | 0,249   | -0,017  | -0,293  |
| TV healthy (E) | 0,917                      | 0,922          |                | 0,771      | 0,902      | 0,140   | -0,039  | -0,186  |
| TV UDT (B)     | 0,805                      | 0,761          | 0,771          |            | 0,899      | -0,411  | -0,430  | -0,667  |
| TV UDT (E)     | 0,880                      | 0,827          | 0,902          | 0,899      |            | -0,180  | -0,430  | -0,324  |
| TAI (B)        | 0,071                      | 0,249          | 0,140          | -0,411     | -0,180     |         | 0,628   | 0,588   |
| TAI (E)        | -0,152                     | -0,017         | -0,039         | -0,430     | -0,430     | 0,628   |         | 0,275   |
| TGP UDT        | -0,281                     | -0,293         | -0,186         | -0,667     | -0,324     | 0,588   | 0,275   |         |

Abbreviations: UDT- undescended testis, TAI - testicular atrophy index, TGP – testicular growth percentage, TV – testicular volume, (B) - beginning, (E) – end.
